# Supplementary material
Source: PubMed Central journal article supplement (PMC6413279)

miR-155 promoted tumorigenesis of gastric cancer

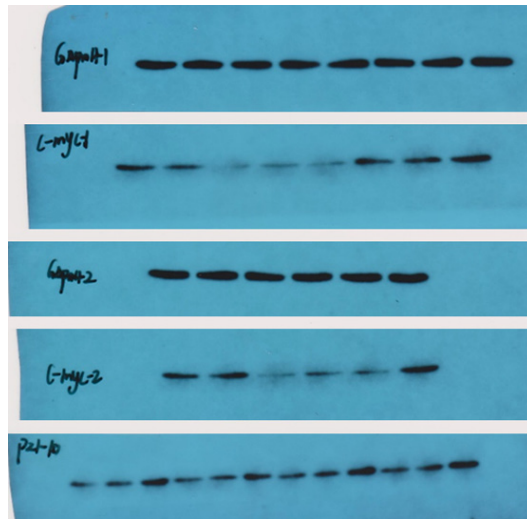

Figure S1. Original Western blot pictures.

Supplement: ajtr0011-0793-f7.pdf [file ajtr0011-0793-f7.pdf]
